# Supplementary material for: Comprehensive Real-World Assessment of Marketed Medications to Guide Parkinson’s Drug Discovery
Source: PubMed Central journal article supplement — Clin Drug Investig. 2019 Jul 20;39(11):1067–75. doi: 10.1007/s40261-019-00830-4 (PMC6800403; doi:10.1007/s40261-019-00830-4), 2019-07-20
Supplement: 40261_2019_830_MOESM1_ESM.pdf [file 40261_2019_830_MOESM1_ESM.pdf]

Journal: Clinical Drug Investigation

Title: Comprehensive real-world assessment of marketed medications to guide Parkinson's drug discovery

Authors: M. Soledad Cepeda<sup>1</sup>, MD, PhD, David Kern<sup>1</sup>, PhD, Guy R. Seabrook<sup>2</sup>, PhD, Simon Lovestone<sup>3</sup>, MD, PhD

Affiliations: <sup>1</sup>Janssen Research & Development, Titusville, NJ 08560 USA; <sup>2</sup>Johnson & Johnson Innovation, 5000 Shoreline Court, South San Francisco, CA 94080 USA; <sup>3</sup>Janssen Research & Development, Beerse Turnhoutseweg 30 2340 Belgium

**Supplementary material 1 ICD 9 and 10 codes used to define Parkinson's disease**

| Code   | Name                                                | Vocabulary |
|--------|-----------------------------------------------------|------------|
| G21.1  | Other drug-induced secondary parkinsonism           | ICD10      |
| G21.3  | Postencephalitic parkinsonism                       | ICD10      |
| G21    | Secondary parkinsonism                              | ICD10      |
| G21.9  | Secondary parkinsonism, unspecified                 | ICD10      |
| G21.19 | Other drug induced secondary parkinsonism           | ICD10      |
| G21.8  | Other secondary parkinsonism                        | ICD10      |
| G21.4  | Vascular parkinsonism                               | ICD10      |
| G21.2  | Secondary parkinsonism due to other external agents | ICD10      |
| G21.11 | Neuroleptic induced parkinsonism                    | ICD10      |
| G22    | Parkinsonism in diseases classified elsewhere       | ICD10      |
| G20    | Parkinson disease                                   | ICD10      |
| 332    | Parkinson's disease                                 | ICD9       |
| 332.1  | Secondary parkinsonism                              | ICD9       |

**Supplementary material 2 Beta adrenoreceptor modulation medications by Anatomical Therapeutic Chemical (ATC) Classification System.**

| <b>Beta blocking agents, non-selective</b> | <b>Alpha and beta blocking agents</b> | <b>Beta blocking agents, selective</b> | <b>Selective beta-2-adrenoreceptor agonists</b> |
|--------------------------------------------|---------------------------------------|----------------------------------------|-------------------------------------------------|
| Alprenolol                                 | Carvedilol                            | Acebutolol                             | Bitolterol                                      |
| Bopindolol                                 | Labetalol                             | Atenolol                               | Carbuterol                                      |
| Bupranolol                                 |                                       | Betaxolol                              | Clenbuterol                                     |
| Carteolol                                  |                                       | Bevantolol                             | Fenoterol                                       |
| Cloranolol                                 |                                       | Bisoprolol                             | Formoterol                                      |
| Mepindolol                                 |                                       | Celiprolol                             | Hexoprenaline                                   |
| Nadolol                                    |                                       | Epanolol                               | Indacaterol                                     |
| Oxprenolol                                 |                                       | Esmolol                                | Isoetarine                                      |
| Penbutolol                                 |                                       | Landiolol                              | Olodaterol                                      |
| Pindolol                                   |                                       | Metoprolol                             | Pirbuterol                                      |
| Propranolol                                |                                       | Nebivolol                              | Procaterol                                      |
| Sotalol                                    |                                       | Practolol                              | Reproterol                                      |
| Tertatolol                                 |                                       | S-atenolol                             | Rimiterol                                       |
| Timolol                                    |                                       | Talinolol                              | Salbutamol                                      |
|                                            |                                       |                                        | Salmeterol                                      |
|                                            |                                       |                                        | Terbutaline                                     |
|                                            |                                       |                                        | Tretoquinol                                     |
|                                            |                                       |                                        | Tulobuterol                                     |
